# Supplementary material for: Comparative Analysis of Clinical and Medication Information between Chronic Hepatitis B Patients with Damp Heat Syndrome and Spleen Deficiency Syndrome
Source: Evid Based Complement Alternat Med. 2020 Dec 28;2020:8846637. doi: 10.1155/2020/8846637 (PMC7781698; doi:10.1155/2020/8846637)
Supplement: Supplementary Materials — Additional file 1 (Supplementary Table 1. Comparison of clinical index difference and medication between group A and group B). Additional file 2 (Diagnostic criteria for damp-heat and spleen deficiency syndrome differentiation of CHB patients). [file 8846637.f1.zip]

Archive with 2 entries (2 files):
- 8846637.f1/Additional file 1 (1).docx
- 8846637.f1/Additional file 2.docx
